# Supplementary material for: Benefits of Steroid Therapy in COVID-19 Patients with Different PaO2/FiO2 Ratio at Admission
Source: MDPI journal article supplement (doi:10.3390/jcm10153236), 2021-07-22
Supplement: s1 [file s1]

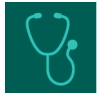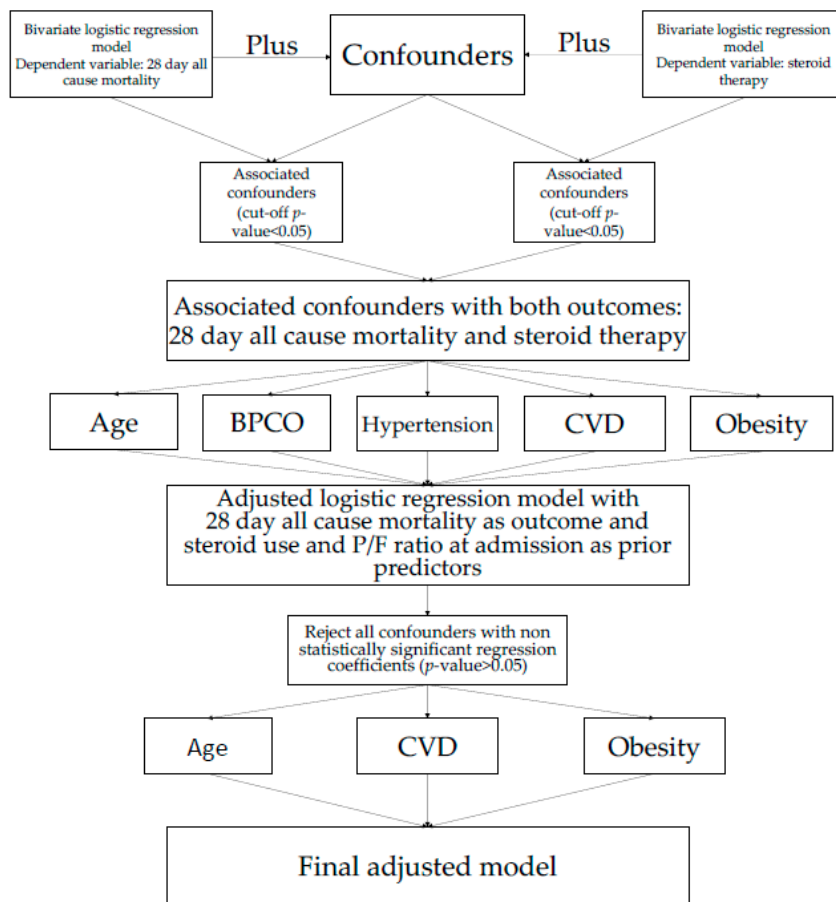

**Figure S1.** Flow diagram of the method used for confounders selection.

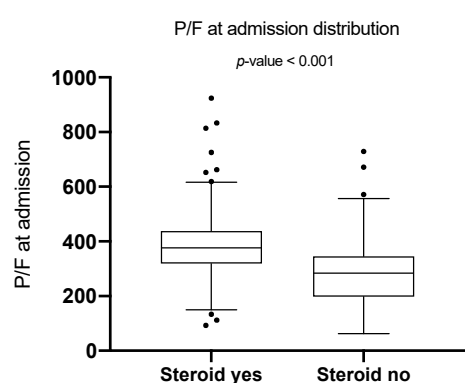

**Figure S2.** Box plot of the P/F distribution between the two cohorts: steroid treated patients and non steroid patients.

**Table S1.** Odds Ratios and CI for unadjusted and adjusted model involving death within 28 days as outcome.

| Patients feature                |             | Total N (%)     | Deceased N(%)     | Unadjusted model   |         | Adjusted model     |         |
|---------------------------------|-------------|-----------------|-------------------|--------------------|---------|--------------------|---------|
|                                 |             |                 |                   | OR (95% CI)        | p-value | OR (95% CI)        | p-value |
| CVD                             | No          | 358 (70.1)      | 8 (2.2)           |                    |         | ref                |         |
|                                 | Yes         | 143 (28.0)      | 33 (23.1)         |                    |         | 3.97 (1.89 - 8.32) | <0.001  |
| Obesity                         | No          | 447 (87.5)      | 37 (8.3)          |                    |         | ref                |         |
|                                 | Yes         | 64 (12.5)       | 14 (21.9)         |                    |         | 3.60 (1.58 - 8.23) | 0.002   |
| Age                             | <50 Years   | 110 (21.5)      | 3 (2.7)           |                    |         | ref                | -       |
|                                 | 50-70 Years | 198 (38.7)      | 9 (4.6)           |                    |         | 0.68 (0.16 - 2.83) | 0.592   |
|                                 | >70 Years   | 203 (39.7)      | 39 (19.2)         |                    |         | 2.18 (0.58 - 8.24) | 0.250   |
| use of Steroid                  | No          | 311 (60.9)      | 12 (3.9)          | ref                |         | ref                |         |
|                                 | Yes         | 200 (39.1)      | 39 (19.5)         | 0.38 (0.04 - 3.34) | 0.383   | 0.62 (0.06 - 6.69) | 0.691   |
| Overall                         | -           | 511 (100.0)     | 51 (10.0)         |                    |         |                    |         |
| P/F at admission (Median - IQR) |             | 343 (271 - 406) | 352 (288.5 - 410) | 0.99 (0.98 - 0.99) | <0.001  | 0.99 (0.98 - 1.00) | 0.002   |
| P/F at admission * Steroid use  |             | -               | -                 | 1.01 (1.00 - 1.01) | 0.061   | 1.01 (1.00 - 1.01) | 0.182   |

<sup>1</sup> List of abbreviations: CVD: Cardiovascular disease; COPD: Chronic obstructive pulmonary disease; OR: Odds-ratio; CI: Confidence intervals; P/F: PaO<sub>2</sub>/FiO<sub>2</sub> ratio.

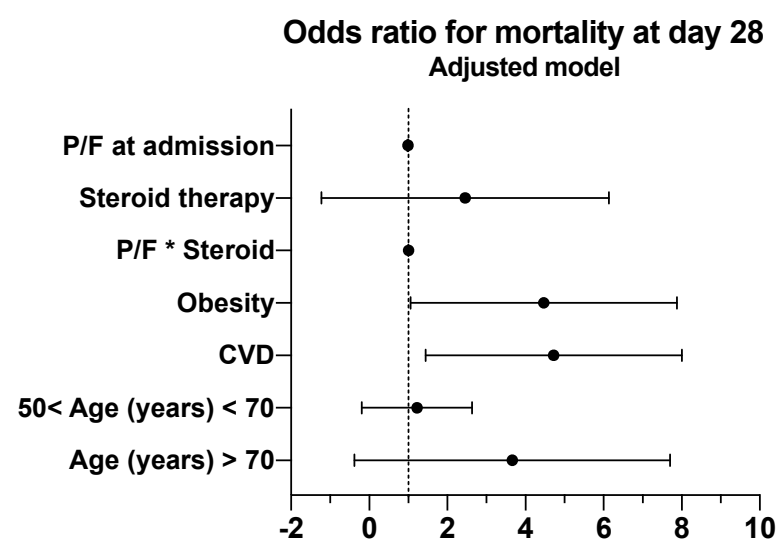

**Figure S3.** Odds ratio related to the adjusted model involving mortality at day 28 as outcome. **Table S2.** Odds Ratios and CI for unadjusted and adjusted model involving death within 28 days or Intensive Care Unit admission as combined outcome.

| Patients feature                |             | Total N (%)     | Death or ICU N (%) | Unadjusted model   |         | Adjusted model     |         |
|---------------------------------|-------------|-----------------|--------------------|--------------------|---------|--------------------|---------|
|                                 |             |                 |                    | OR (95% CI)        | p-value | OR (95% CI)        | p-value |
| CVD                             | No          | 358 (70.1)      | 41 (11.5)          |                    |         | ref                |         |
|                                 | Yes         | 143 (28.0)      | 44 (30.8)          |                    |         | 2.75 (1.46 - 5.18) | 0.002   |
| Obesity                         | No          | 447 (87.5)      | 73 (16.3)          |                    |         | ref                |         |
|                                 | Yes         | 64 (12.5)       | 22 (34.4)          |                    |         | 2.61 (1.27 - 5.34) | 0.009   |
| Age                             | <50 Years   | 110 (21.5)      | 12 (10.9)          |                    |         | ref                | -       |
|                                 | 50-70 Years | 198 (38.7)      | 31 (15.7)          |                    |         | 0.76 (0.33 - 1.76) | 0.520   |
|                                 | >70 Years   | 203 (39.7)      | 52 (25.6)          |                    |         | 0.77 (0.32 - 1.84) | 0.562   |
|                                 |             |                 |                    |                    |         |                    |         |
| Use of Steroid                  | No          | 311 (60.9)      | 15 (4.8)           | ref                |         | ref                |         |
|                                 | Yes         | 200 (39.1)      | 80 (40.0)          | 0.67 (0.09 - 5.04) | 0.695   | 0.77 (0.09 - 6.36) | 0.806   |
| Overall                         | -           | 511 (100.0)     | 95 (18.6)          |                    |         |                    |         |
| P/F at admission (Median - IQR) |             | 343 (271 - 406) | 356 (296 - 419)    | 0.99 (0.98 - 0.99) | <0.001  | 0.99 (0.98 - 0.99) | <0.001  |
| P/F at admission * Steroid use  |             | -               | -                  | 1.01 (1.00 - 1.02) | 0.02    | 1.01 (1.00 - 1.01) | 0.033   |

<sup>1</sup> List of abbreviations: CVD: Cardiovascular disease; COPD: Chronic obstructive pulmonary disease; OR: Odds-ratio; CI: Confidence intervals; P/F: PaO<sub>2</sub>/FiO<sub>2</sub> ratio.

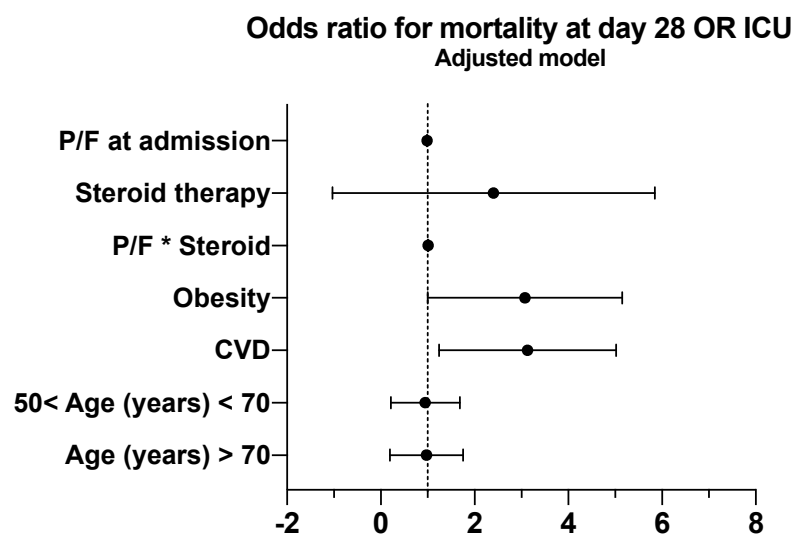

**Figure S4.** Odds ratio related to the adjusted model involving mortality at day 28 or Intensive Care Unit admission as combined outcome
